# Supplementary material for: Size-Exclusion Chromatography as a Technique for the Investigation of Novel Extracellular Vesicles in Cancer
Source: Cancers (Basel). 2020 Oct 27;12(11):3156. doi: 10.3390/cancers12113156 (PMC7693800; doi:10.3390/cancers12113156)
Supplement: Supplementary file 1 [file cancers-12-03156-s001.pdf]

# Size Exclusion Chromatography as a Technique for the Investigation of Novel Extracellular Vesicles in Cancer

Daniel S. K. Liu, Flora M. Upton, Eleanor Rees, Christopher Limb, Long R. Jiao, Jonathan Krell and Adam E. Frampton

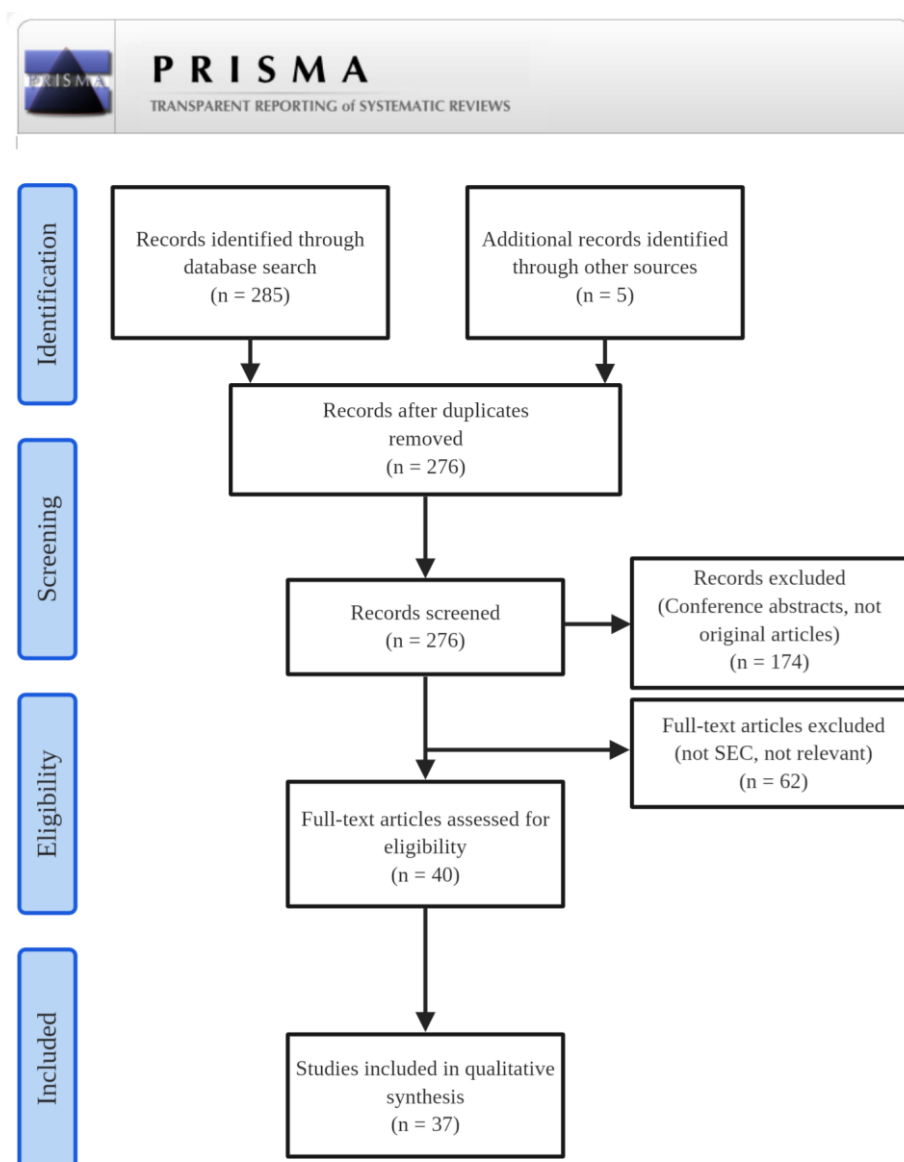

**Figure S1.** PRISMA Flow Chart.

**Table S1.** Size-exclusion methodology compared in 37 papers reviewed (ordered chronologically).

| Authors & Reference    | Publication Title                                                                                                                       | Pub. Year | Biofluids         | Preparation Method                                                                                                                                                                                                                         | Loading Volume | Method of Isolation                                                     | Concentration Step                                                                                                                               |
|------------------------|-----------------------------------------------------------------------------------------------------------------------------------------|-----------|-------------------|--------------------------------------------------------------------------------------------------------------------------------------------------------------------------------------------------------------------------------------------|----------------|-------------------------------------------------------------------------|--------------------------------------------------------------------------------------------------------------------------------------------------|
| Taylor et al. [67]     | T-cell apoptosis and suppression of T-cell receptor/CD3-zeta by Fas ligand-containing membrane vesicles shed from ovarian tumours       | 2003      | Human serum       | Sample clotted and centrifuged (400× g for 10 min)                                                                                                                                                                                         | 500 µL         | Bio-Gel A50m column (1.5 × 45 cm)                                       | UC (100,000× g for 1 h)                                                                                                                          |
| Altanerova et al. [2]  | Fas ligand-positive membranous vesicles isolated from sera of patients with oral cancer induce apoptosis of activated T lymphocytes.    | 2005      | Human serum; CCM  | Not described                                                                                                                                                                                                                              | 500 µL         | Sepharose 2B in 1.0 × 35 cm column                                      | UC (105,000× g for 1 h)                                                                                                                          |
| Wieckowski et al. [78] | Tumour-derived microvesicles promote regulatory T cell expansion and induce apoptosis in tumour-reactive activated CD8+ T lymphocytes.  | 2009      | Human serum; CCM  | Not described                                                                                                                                                                                                                              | -              | Sepharose 2B in 1.0 × 35 cm column                                      | UC (105,000× g for 1 h)                                                                                                                          |
| Rabinowits et al. [65] | Exosomal microRNA: a diagnostic marker for lung cancer.                                                                                 | 2009      | Human plasma      | Not described                                                                                                                                                                                                                              | 1 mL           | Sepharose 2B                                                            | Magnetic immunoaffinity to EpCAM                                                                                                                 |
| Davies et al. [93]     | Microfluidic filtration system to isolate extracellular vesicles from blood.                                                            | 2012      | Mouse whole blood | Not described                                                                                                                                                                                                                              | Up to 240 µL   | Microfluidic platform involving photopatterned porous polymer monoliths | n/A                                                                                                                                              |
| Muller et al. [32]     | Isolation of biologically-active exosomes from human plasma.                                                                            | 2014      | Human plasma      | Differential centrifugation (1,000× g for 10 min, 10,000× g for 30 min) followed by filtration (0.22 µm)                                                                                                                                   | 9 mL           | Sepharose 2B in an A50m column                                          | UC (105,000× g for 2 h)                                                                                                                          |
| Hong et al. [40]       | Plasma exosomes as markers of therapeutic response in patients with acute myeloid leukaemia.                                            | 2014      | Human plasma      | Differential centrifugation (1,000× g for 10 min), filtration (0.22 µm) and repeat centrifugation (10,000× g for 30 min)                                                                                                                   | 9 mL           | Sepharose 2B in an A50m column                                          | UC (100,000× g for 2 h)                                                                                                                          |
| Schuler et al. [80]    | Human CD4+ CD39+ regulatory T cells produce adenosine upon co-expression of surface CD73 or contact with CD73+ exosomes or CD73+ cells. | 2014      | Human plasma      | Differential centrifugation (1,000× g for 10 min, 10,000× g for 10 min) followed by filtration (0.22 µm)                                                                                                                                   | 5 mL           | Sepharose 2B in an A50m column                                          | UC (100,000× g for 3 h)                                                                                                                          |
| Lobb et al. [41]       | Optimized exosome isolation protocol for cell culture supernatant and human plasma.                                                     | 2015      | CCM               | Clarified CCM was prepared by 300× g for 10 min, then filtration (0.22 µm). Subsequent concentration to 500µL with either pressure-driven (Stirred Cell) or centrifugation-based (Centricon Merck Millipore, Burlington, MA, USA) methods. | 500µL          | qEV column (Izon)                                                       | Pooled and concentrated to 200 µL with Amicon Ultra-4 (10 kDa) (Merck Millipore, Burlington, MA, USA)                                            |
|                        |                                                                                                                                         |           | Human plasma      | Differential centrifugation (1,200× g for 10 min, then 1,800× g for 10 min) before storage. After thaw differential centrifugation (1,500× g for 10 min, then 10,000× g for 20 min)                                                        | 1mL            |                                                                         | Filtration (Ultrafree 0.22 µm) (Merck Millipore, Burlington, MA, USA) then concentration to 200 µL with Amicon Ultra-4 (10kDa) (Merck Millipore) |
| Welton et al. [89]     | Ready-made chromatography columns for extracellular vesicle isolation from plasma.                                                      | 2015      | CCM               | Differential centrifugation (400× g for 10 min, then 2,000× g for 15 min) and filtration (0.22 µm)                                                                                                                                         | 1mL            | Exo-Spin Midi Columns (Cell Guidance Systems, Cambridge, UK)            | UC (200,000× g for 2 h) or by a precipitation method Exosome precipitant, from the Exo-Spin                                                      |

|                            |                                                                                                                                                 |      |                   |                                                                                                                                                                   |              |                                                      |                                                            |
|----------------------------|-------------------------------------------------------------------------------------------------------------------------------------------------|------|-------------------|-------------------------------------------------------------------------------------------------------------------------------------------------------------------|--------------|------------------------------------------------------|------------------------------------------------------------|
|                            |                                                                                                                                                 |      | Human plasma      | Blood plasma obtained with 400× g spin for 7 min, then 6,000× g for 10 min and filtration (0.22 µm)                                                               | Up to 1.5 mL |                                                      | kit (Cell Guidance Systems, St. Luis, MO, USA)             |
| Hong et al. [69]           | Isolation of biologically active and morphologically intact exosomes from plasma of patients with cancer.                                       | 2016 | Human plasma      | 1,000× g for 10 min before storage. Differential centrifugation (2,000× g for 10 min, then 10,000–14,000× g for 30 min) and filtration (0.22 µm)                  | 0.5–1 mL     | Mini-SEC (Sephacryl 2B in 1.5cm × 12cm mini columns) | VivaSpin 500 (300,000 MWCO; Sartorius, Göttingen, Germany) |
| Sakha et al. [63]          | Exosomal microRNA miR-1246 induces cell motility and invasion through the regulation of DENND2D in oral squamous cell carcinoma.                | 2016 | CCM               | Filtration (0.45 µm), then concentration with Amicon Ultra-15 (10 kDa) at 5,000× g for 70 min                                                                     | 400 µL       | Sephacryl S-400 in a 5 mL column                     | Not described                                              |
| van Eijndhoven et al. [33] | Plasma vesicle miRNAs for therapy response monitoring in Hodgkin lymphoma patients.                                                             | 2016 | Human plasma      | Differential centrifugation (900× g 7 min, then 2,500× g for 10 min, then 500× g for 10min)                                                                       | 1.5 mL       | Sephacryl CL/2B in a 10 mL column bed volume         | n/A                                                        |
|                            |                                                                                                                                                 |      | Human serum       | Differential centrifugation (1,710× g for 7 min, then 500× g for 10 min)                                                                                          |              |                                                      |                                                            |
| Djusberg et al. [43]       | High levels of the AR-V7 Splice Variant and Co-Amplification of the Golgi Protein Coding YIPF6 in AR Amplified Prostate Cancer Bone Metastases. | 2017 | CCM; Human plasma | Centrifugation (3,000× g for 30 min) then filtration (0.45 µm), and concentration with Amicon-15 (100 kDa) filter                                                 | 500 µL       | qEV column (Izon)                                    | n/A                                                        |
| Kawakami et al. [31]       | Gamma-glutamyltransferase activity in exosomes as a potential marker for prostate cancer.                                                       | 2017 | Human serum       | Centrifugation at 1800× g before freezing                                                                                                                         | 500 µL       | EVSecond (GL Science, Tokyo, Japan)                  | n/A                                                        |
| Ludwig et al. [81]         | Suppression of Lymphocyte Functions by Plasma Exosomes Correlates with Disease Activity in Patients with Head and Neck Cancer.                  | 2017 | Human plasma      | 1,000× g for 10 min before storage. Differential centrifugation (2,000× g for 10 min, then 14,000× g for 30 min) and filtration (0.22 µm)                         | 1mL          | Mini-SEC (Sephacryl 2B in 1.5 × 12cm mini columns)   | VivaSpin 500 (300,000 MWCO)                                |
| Suarez et al. [87]         | A bead-assisted flow cytometry method for the semi-quantitative analysis of Extracellular Vesicles.                                             | 2017 | CCM               | Differential centrifugation (400× g for 5 min and 2,000× g for 10 min) and concentration with Amicon-15 filter                                                    | 1.5mL        | Sephacryl CL-2B in a 20 mL syringe                   | n/A                                                        |
| Guerreiro et al. [1]       | Efficient extracellular vesicle isolation by combining cell media modifications, ultrafiltration, and size-exclusion chromatography.            | 2018 | CCM               | Differential centrifugation (4,000× g for 5 min, then 15,000× g for 45 min) then concentration using Amicon-Ultra 15 (30 kDa, 50 kDa, and 100 kDa)                | 4mL          | Sephacryl CL-2B in 30mL column                       | Immunoaffinity capture of CD9+ used for flow cytometry     |
| Ludwig et al. [82]         | Exosomes from HNSCC Promote Angiogenesis through Reprogramming of Endothelial Cells.                                                            | 2018 | CCM               | Differential centrifugation (2,000× g for 10 min, then 10,000× g for 10 min) followed by filtration (0.22 µm), and concentration with Vivacell 100 (100,000 MWCO) | 1mL          | Mini-SEC (Sephacryl 2B in 1.5 × 12cm mini columns)   | Amicon Ultra 0.5 mL (100kDa)                               |
|                            |                                                                                                                                                 |      | Human plasma      | Differential centrifugation (1,000× g for 10 min before storage, after thaw 2,000× g for 10 min, then 10,000× g for 30 min) and filtration (0.22 µm)              |              |                                                      |                                                            |

|                                |                                                                                                                                                                               |      |                             |                                                                                                                                                                                     |               |                                                                                                |                                                                                |
|--------------------------------|-------------------------------------------------------------------------------------------------------------------------------------------------------------------------------|------|-----------------------------|-------------------------------------------------------------------------------------------------------------------------------------------------------------------------------------|---------------|------------------------------------------------------------------------------------------------|--------------------------------------------------------------------------------|
| Peacock et al. [64]            | Extracellular vesicle microRNA cargo is correlated with HPV status in oropharyngeal carcinoma.                                                                                | 2018 | CCM                         | Differential centrifugation (300× g for 10 min, 2000× g for 10 min, 10,000× g for 30 min) then concentrated to 0.5 mL using Vivaspin-20 (100 kDa MWCO)                              | 500 µL        | Sepharose CL-2B in Econo-Pac columns (Bio-rad, Hercules, California, USA)                      | UC (100,000× g for 1 h)                                                        |
| Smith et al. [92]              | Integrated nanoscale deterministic lateral displacement arrays for separation of extracellular vesicles from clinically-relevant volumes of biological samples.               | 2018 | Human serum and urine       | Diluted 1:4, labelled with SYBRgold and filtered (0.22 µm)                                                                                                                          | 500 µL        | Microfluidic platform involving a nanoscale deterministic lateral displacement (nanoDLD) array | n/A                                                                            |
|                                |                                                                                                                                                                               |      | Human serum and urine       | Centrifugation (14,000 RPM for 20 min)                                                                                                                                              | 500 µL        | qEVoriginal (Izon)                                                                             | Concentration with Corning (50K MWCO)                                          |
| Theodoraki et al. [46]         | Separation of plasma-derived exosomes into CD3(+) and CD3(-) fractions allows for association of immune cell and tumour cell markers with disease activity in HNSCC patients. | 2018 | Human plasma                | Differential centrifugation (1,000× g for 10 min before storage, after thaw 2,000× g for 10 min, then 10,000× g for 30 min) and filtration (0.22 µm)                                | 1mL           | Mini-SEC (Sephacrose 2B in 1.5cm x 12cm mini columns)                                          | Vivaspin 500 (300,000 MWCO) or captured with streptavidin magnetic beads       |
| Theodoraki et al. [83]         | Plasma-derived Exosomes Reverse Epithelial-to-Mesenchymal Transition after Photodynamic Therapy of Patients with Head and Neck Cancer.                                        | 2018 | Human plasma                | Differential centrifugation (1,000× g for 10 min before storage, after thaw 2,000× g for 10 min, then 14,000× g for 30 min) and filtration (0.22 µm)                                | 1 mL          | Mini-SEC (Sephacrose 2B in 1.5 × 12cm mini columns)                                            | Vivaspin 500 (300,000 MWCO) or captured with streptavidin magnetic beads       |
| Theodoraki et al. [47]         | Clinical Significance of PD-L1(+) Exosomes in Plasma of Head and Neck Cancer Patients.                                                                                        | 2018 | Human plasma                | Differential centrifugation (1,000× g for 10 min before storage, after thaw 2,000× g for 10 min, then 10,000× g for 30 min) and filtration (0.22 µm)                                | 1 mL          | Mini-SEC (Sephacrose 2B in 1.5cm x 12cm mini columns)                                          | Vivaspin 500 (300,000 MWCO) or captured with streptavidin magnetic beads       |
| Abramowicz et al. [53]         | Ionizing radiation affects the composition of the proteome of extracellular vesicles released by head-and-neck cancer cells in vitro.                                         | 2019 | CCM                         | Differential centrifugation (200× g for 10min, 2,000× g for 10 min, 10,000× g for 30min), filtration (0.22 µm), and concentration with Vivacell 100 (Sartorius, Göttingen, Germany) | 1 mL          | qEVoriginal (Izon)                                                                             | Vivaspin 500 (10,000 MWCO)                                                     |
| Altanerova et al. [2]          | Prodrug suicide gene therapy for cancer targeted intracellular by mesenchymal stem cell exosomes.                                                                             | 2019 | CCM                         | Centrifugation (800× g for 5 min) and filtration (0.22 µm)                                                                                                                          | Not described | Sepharose CL-2B column or Sephacryl 500 High Resolution column                                 | n/A                                                                            |
| Broggi et al. [44]             | Tumor-associated factors are enriched in lymphatic exudate compared to plasma in metastatic melanoma patients.                                                                | 2019 | CCM                         | Differential centrifugation (300× g for 10min, 2000× g for 10min, 10,000× g for 20min) then concentration with Amicon Ultra-15                                                      | 500 µL        | qEVoriginal (Izon)                                                                             | n/A                                                                            |
| Czystowska-Kuzmicz et al. [11] | Small extracellular vesicles containing arginase-1 suppress T-cell responses and promote tumor growth in ovarian carcinoma.                                                   | 2019 | Human plasma; Human ascites | Differential centrifugation (500× g for 10 min, 2,500× g for 20min) and filtration (0.22 µm)                                                                                        | 500 µL        | qEV column(Izon)                                                                               | Millipore (100,000 MWCO) or captured with magnetic beads to CD9, CD63, or CD81 |
| Dong et al. [92]               | Efficient isolation and sensitive quantification of extracellular vesicles based on an integrated ExoID-Chip using photonic crystals.                                         | 2019 | Human serum; CCM            | Centrifugation (3000× g for 5 min) and diluted 1:9                                                                                                                                  | 200 µL        | Integrated microfluidic chip (ExoID-Chip)                                                      | n/A                                                                            |
| Freitas et al. [55]            | Different isolation approaches lead to diverse glycosylated extracellular vesicle populations.                                                                                | 2019 | CCM                         | Centrifugation (800× g for 5 min, 2,000× g for 10 min), filtration (0.22                                                                                                            | 500 µL        | qEV (IZON)                                                                                     | Amicon Ultra-15 (10kDa MWCO)                                                   |

|                             |                                                                                                                                                       |      |                                  |                                                                                                                                                             |            |                                                     |                               |
|-----------------------------|-------------------------------------------------------------------------------------------------------------------------------------------------------|------|----------------------------------|-------------------------------------------------------------------------------------------------------------------------------------------------------------|------------|-----------------------------------------------------|-------------------------------|
|                             |                                                                                                                                                       |      |                                  | µm) then UC (100 000× g for 16 h, then 100,000× g for 2 h wash)                                                                                             |            |                                                     |                               |
| Indira Chandran et al. [59] | Ultrasensitive Immunoprofiling of Plasma Extracellular Vesicles Identifies Syndecan-1 as a Potential Tool for Minimally Invasive Diagnosis of Glioma. | 2019 | Human plasma                     | Centrifugation (2,000× g for 10 min) prior to storage                                                                                                       | 500 µL     | qEV columns (IZon)                                  | n/A                           |
| Lane et al. [23]            | Optimizing Size Exclusion Chromatography for Extracellular Vesicle Enrichment and Proteomic Analysis from Clinically Relevant Samples.                | 2019 | CCM EVs spiked into human plasma | CCM (800× g for 5 min, then 10 000× g for 30 min), then concentrated using Amicon Ultra-15 (50 kDa MWCO)<br>Plasma (800× g for 5 min, 12 000× g for 45 min) | 200–500 µL | Sepharose CL-2B and Sepharose 4B in 10 mL columns   | Not described                 |
| Lennon et al. [3]           | Single molecule characterization of individual extracellular vesicles from pancreatic cancer.                                                         | 2019 | CCM                              | CCM (300× g for 10 min) concentrated using Vivaspin 20 (100 kDa MWCO)                                                                                       | 400µL      | qEV original (IZon)                                 | n/A                           |
|                             |                                                                                                                                                       |      | Human plasma                     | n/A                                                                                                                                                         | ~200 µL    |                                                     |                               |
| Ludwig et al. [4]           | Optimization of cell culture conditions for exosome isolation using mini-size exclusion chromatography (mini-SEC).                                    | 2019 | CCM                              | Differential centrifugation (2,000× g for 10 min, then 10,000× g for 30 min), filtration (0.22 µm) and concentration using Vivacell 100                     | 1 mL       | Mini-SEC (Sephacrose 2B in 1.5 × 12cm mini columns) | 0.5 mL Amicon Ultra (100 kDa) |
| Ludwig et al. [57]          | Proteomes of exosomes from HPV(+) or HPV(-) head and neck cancer cells: differential enrichment in immunoregulatory proteins.                         | 2019 | CCM                              | Differential centrifugation (2,000× g for 10 min, then 10,000× g for 30 min), filtration (0.22 µm) and concentration using Vivacell 100                     | 1 mL       | Mini-SEC (Sephacrose 2B in 1.5 × 12cm mini columns) | Vivaspin 500 (100,000 MWCO)   |
| Sjoqvist et al. [86]        | Oral keratinocyte-derived exosomes regulate proliferation of fibroblasts and epithelial cells.                                                        | 2019 | CCM                              | Differential centrifugation (300× g for 10 min, 3000× g for 10 min) and concentration using Amicon Ultra-14 and Ultra-4 (100 kDa then 10 kDa)               | 500 µL     | qEV Original (Izon)                                 | Amicon Ultra-4 (10 kDa)       |
| Theodoraki et al. [48]      | Circulating exosomes measure responses to therapy in head and neck cancer patients treated with cetuximab, ipilimumab, and IMRT.                      | 2019 | Human plasma                     | Differential centrifugation (1,000× g for 10 min before storage, after thaw 2,000× g for 10 min, then 10,000× g for 30 min) and filtration (0.22 µm)        | 1 mL       | Mini-SEC (Sephacrose 2B in 1.5 × 12cm mini columns) | Vivaspin 500 (100,000 MWCO)   |

Abbreviations: min - minutes, h - hour, CCM - Cell Conditioned Media, EpCAM - Epithelial cell adhesion molecule, kDa - kilodaltons, MWCO - Molecular Weight Cut-off, UC – Ultracentrifugation.

**Table S2.** Papers reviewed showing EV characterization (ordered by focus of study).

| Authors & Reference     | Year | Cancer Investigated                   | Source    |                                                                          | Characterization Methods    |                  |                                   |                                                  | Findings                                                                                                                                                                                                             |
|-------------------------|------|---------------------------------------|-----------|--------------------------------------------------------------------------|-----------------------------|------------------|-----------------------------------|--------------------------------------------------|----------------------------------------------------------------------------------------------------------------------------------------------------------------------------------------------------------------------|
|                         |      |                                       | Cell Line | Sample Size                                                              | Protein Composition         |                  | Single vesicle Visualization (EM) | Size And Concentration (NTA)                     |                                                                                                                                                                                                                      |
|                         |      |                                       |           |                                                                          | EV-Enriched                 | Non -EV Enriched |                                   |                                                  |                                                                                                                                                                                                                      |
|                         |      |                                       |           |                                                                          |                             |                  |                                   |                                                  |                                                                                                                                                                                                                      |
| Taylor et al. [67]      | 2003 | Ovarian Cancer                        | -         | OvCa ( <i>n</i> = 11), Controls ( <i>n</i> = 13)                         | MHC Class I, FasL           | No               | No                                | No                                               | Fas ligand-containing membrane vesicles elevated in serum from ovarian cancer patients and reduced expression of the zeta chain in T lymphocytes leading to T-cell apoptosis.                                        |
| Altanerova et al. [2]   | 2005 | Oral Squamous cell carcinoma          | PCI-13    | OSCC ( <i>n</i> = 27), Control ( <i>n</i> = 20)                          | FasL                        | No               | Yes                               | No                                               | FasL positive microvesicles in sera were correlated with T stage, able to induce death in activated T cells but this was also shown in FasL-negative patients.                                                       |
| Hong et al. [40]        | 2014 | Acute Myeloid Leukaemia               | -         | AML ( <i>n</i> = 16), Controls ( <i>n</i> = 7)                           | CD9, CD81, LAMP-1           | No               | Yes                               | No                                               | Changes in exosomal protein and/or TGF-β1 content were altered in response to AML chemotherapy.                                                                                                                      |
| Djusberg et al. [43]    | 2017 | Castration-resistant Prostate cancer  | 22Rv1     | CRPC ( <i>n</i> = 3), Controls ( <i>n</i> = 3)                           | No                          | No               | No                                | NanoSight 300 (Malvern Panalytical, Malvern, UK) | EVs from YIPF6-overexpressing 22Rv1 cells contained tissue factor and other coagulation factors decreasing clotting time in plasma                                                                                   |
| Kawakami et al. [31]    | 2017 | Prostate Cancer                       | -         | CRPC ( <i>n</i> = 6), CSPC ( <i>n</i> = 31), Control BPH ( <i>n</i> = 8) | CD9, PSMA, β-actin and GGT1 | No               | No                                | No                                               | GGT1 exosomal expression correlated with PC but in vivo EVs isolated by UC and not SEC. UC EVs showed no clear association in PC patients                                                                            |
| Theodoraki et al. [46]  | 2018 | Head and Neck Squamous cell carcinoma | -         | HNSCC ( <i>n</i> = 22), Controls ( <i>n</i> = 6)                         | TSG 101                     | No               | Yes                               | qNano (Izon Science, Christchurch, New Zealand)  | CD3+ exosomes represented a higher proportion (50%) in HNSCC patients compared to 20–30% in healthy donors. High levels of CD44v3 on CD3– exosomes were associated with unfavourable clinicopathological parameters. |
| Theodoraki, et al. [47] | 2018 | Head and Neck Squamous cell           | -         | HNSCC ( <i>n</i> = 40)                                                   | No                          | No               | No                                | No                                               | Exosomal PD-L1 were associated with disease activity and with clinical stage but not with serum PD-L1 levels. There was also                                                                                         |

|                             |      | carcinoma                             |                |                                          |  |                                                            |       |                              |                               | dose-dependent inhibition of CD8+ effector T cell activity.                                                                                                                                                                                                                    |
|-----------------------------|------|---------------------------------------|----------------|------------------------------------------|--|------------------------------------------------------------|-------|------------------------------|-------------------------------|--------------------------------------------------------------------------------------------------------------------------------------------------------------------------------------------------------------------------------------------------------------------------------|
| Abramowicz et al. [53]      | 2019 | Human Head and Neck cancer            | UM-SCC6        | -                                        |  | CD9, CD63, CD81                                            | No    | Yes                          | ZetaSizer Nano-ZS90 (Malvern) | Exosome markers upregulated by radiation; these included proteins associated with DNA repair, regulation of ROS metabolic process and de novo protein folding upregulated.                                                                                                     |
| Broggi et al. [44]          | 2019 | Melanoma                              | B16-F10        | -                                        |  | CD81, TSG 101 (CD9, CD63, ALIX, syntenin in UC plasma EVs) | No    | Yes                          | NanoSight (Malvern)           | SEC isolated fluorescently labeled EVs were demonstrated to be trafficked via lymphatics into the systemic circulation in mice. Clinical study using dUC showed a differential proteomic profile between cohorts with nodal metastasis.                                        |
| Freitas et al. [55]         | 2019 | Human gastric cancer                  | MKN45          | -                                        |  | HSP70, syntenin-1, CD9, CD63, ALIX and CD81                | Cyt C | Yes                          | NanoSight NS300 (Malvern)     | All methods were successful in isolating EVs carrying glycoproteins bearing n-linked and truncated O-linked glycans. Additionally, changing the glycosylation of the MKN45 cells impacts the glycosylation profile of isolated EVs.                                            |
| Indira Chandran et al. [59] | 2019 | Glioma                                | -              | Low- and high-grade Glioma ( $n = 82$ )  |  | LC-MS showed Tetraspanins                                  | No    | Yes and immunoblot anti-SDC1 | NanoSight LM10-HS (Malvern)   | Plasma EV protein syndecan-1, was able as a single marker to discriminate between GBM and LGG with an AUC of 0.82 and a sensitivity and specificity of 71% and 80%, respectively.                                                                                              |
| Ludwig et al. [57]          | 2019 | Head and Neck cancer                  | SCC-90, PCI-30 | -                                        |  | TSG101, ALIX, CD63 and CD81                                | No    | Yes                          | qNano (Izon)                  | Differential enrichment in proteomic analysis of TEX from HPV+ and HPV- HNSCC cells identified that are biologically active e.g. CD47, CD276, MUC1.                                                                                                                            |
| Theodoraki et al. [47]      | 2019 | Head and Neck Squamous cell carcinoma | -              | HNSCC ( $n = 18$ ), Controls ( $n = 5$ ) |  | CD9, CD63, CD81 (flow cytometry and microarray)            | No    | Yes                          | qNano (Izon)                  | The TEX/total exosome ratios of disease-free patients remained low at week 14, but ratios increased ( $p = 0.03$ ) in four patients who recurred. High levels of CD3-/PD-L1+ and CD3-/CTLA4+ exosomes at baseline might indicate patients who would benefit from immunotherapy |

## RNA Studies

|                            |      |                                               |                                          |                                                            |                                 |    |     |                     |                                                                                                                                                                                                                                                                                             |
|----------------------------|------|-----------------------------------------------|------------------------------------------|------------------------------------------------------------|---------------------------------|----|-----|---------------------|---------------------------------------------------------------------------------------------------------------------------------------------------------------------------------------------------------------------------------------------------------------------------------------------|
| Rabinowits et al. [65]     | 2009 | Lung adenocarcinoma                           | -                                        | Lung Cancer ( $n = 27$ ), Control ( $n = 9$ )              | No                              | No | No  | No                  | Using microarray but did not report candidates. Increased EV protein and RNA concentration in cancer cohort.                                                                                                                                                                                |
| Sakha et al. [63]          | 2016 | Human oral squamous cell carcinoma            | HOC313-LM                                | -                                                          | CD9, CD63 and CD81              | No | Yes | No                  | 7 candidates (miR-17, miR-30a-3p, miR-30a-5p, miR92a, miR-181a, miR-342-3p and miR-1246) were differentially expressed oncogenic miRNAs in both cellular and exosomal data. DENND2D is a direct target of miRNA-1246 and enhanced the migration and invasion ability in co-incubated cells. |
| van Eijndhoven et al. [33] | 2016 | Classical Hodgkin lymphoma (cHL)              | -                                        | cHL ( $n = 20$ ), Control (Healthy $n = 9$ , SLE $n = 4$ ) | No                              | No | Yes | qNano (Izon)        | Increased concentrations of EVs in the plasma of cHL patients compared with healthy. EV-associated miR21-5p, miR127-3p, let7a-5p, miR24-3p, and miR155-5p signals were elevated in primary and relapsed cHL patients compared with healthy individuals.                                     |
| Peacock et al. [64]        | 2018 | Oropharyngeal Squamous cell carcinoma (OPSCC) | SCC2, SCC90, SCC72, SCC90                | -                                                          | CD9, CD63, TSG101               | No | No  | qNano (Izon)        | Sequencing identified 2–15% aligned to miRNA sequences, with the rest mRNA, rRNA, tRNA, snoRNA, snRNA and lincRNA. 14 miRNA were enriched in HPV+ cell-derived EVs, whereas 19 miRNAs were enriched in HPV- EVs.                                                                            |
| <b>Functional Studies</b>  |      |                                               |                                          |                                                            |                                 |    |     |                     |                                                                                                                                                                                                                                                                                             |
| Wieckowski et al. [78]     | 2009 | Head and Neck cancer, Melanoma                | FasL-transduced PCI-13, Mel-SW and SLM-2 | HNSCC and melanoma ( $n = 35$ ), Control ( $n = 25$ ),     | FasL, MHC Class I, CD63, LAMP-1 | No | No  | No                  | Tumour-derived microvesicles (MVs) did not promote ex vivo proliferation of resting T-cells, impaired signalling and induced apoptosis of activated primary CD8+ T-cells and promoted proliferation of activated CD4+ T-cells.                                                              |
| Muller et al. [32]         | 2014 | Not described                                 | -                                        | Varied                                                     | TSG101, CD81, GAPDH             | No | Yes | NanoSight (Malvern) | Feasibility of miniSEC method. Morphologically intact exosomes can be successfully purified from fresh or frozen human plasma with the ability to down-regulate CD69 expression on human activated CD4+ T cells                                                                             |

|                                |      |                                                                        |                                 |                                                                      |                         |    |                     |                           |                                                                                                                                                                                                                                                                                                                              |
|--------------------------------|------|------------------------------------------------------------------------|---------------------------------|----------------------------------------------------------------------|-------------------------|----|---------------------|---------------------------|------------------------------------------------------------------------------------------------------------------------------------------------------------------------------------------------------------------------------------------------------------------------------------------------------------------------------|
| Schuler et al. [80]            | 2014 | Head and Neck Squamous cell carcinoma (HNSCC)                          | PCI-13, Kasumi-1                | HNSCC ( <i>n</i> = 13), Control ( <i>n</i> = 30)                     | CD9, CD81, CD39 and CD7 | No | Yes                 | NanoSight (Malvern)       | Plasma EVs from HNSCC patients or NC plasma carry active enzymes and can carry CD39 and CD73 proteins to Treg cells leading to immunosuppressive ADO production.                                                                                                                                                             |
| Hong et al. [69]               | 2016 | Acute myeloid leukaemia (AML) or Head and Neck Squamous cell carcinoma | -                               | AML ( <i>n</i> = 10), HNSCC ( <i>n</i> = 5), Control ( <i>n</i> = 5) | CD9, CD63 and TSG101    | No | Yes                 | qNano (Izon)              | AML exosomes co-incubated with normal human NK cells inhibit NKG2D expression levels and HNSCC exosomes suppress activation and proliferation of activated T lymphocytes.                                                                                                                                                    |
| Ludwig et al. [81]             | 2017 | Head and Neck cancer (HNC)                                             | -                               | HNC ( <i>n</i> = 38) or Controls ( <i>n</i> = 14)                    | TSG101                  | No | Yes                 | qNano (Izon)              | EVs from patients with active disease induced significantly stronger apoptosis of CD8 <sup>+</sup> T cells, greater inhibition of T-cell proliferation or of NKG2D expression on NK cells and better upregulation of suppressor functions in CD4 <sup>+</sup> CD39 <sup>+</sup> Treg than EVs from patients with no disease. |
| Ludwig et al. [82]             | 2018 | Head and Neck Squamous cell carcinoma                                  | PCI-13 UMSCC47, UMSCC90, SCCVII | HNSCC ( <i>n</i> = 10) or Controls ( <i>n</i> = 3)                   | TSG101                  | No | Yes                 | qNano (Izon)              | Plasma-derived EVs from patients with HNSCC plasma alter HUVECs tube formation, migration, wound healing, and proliferation. Increased vascularization in murine 4-NQO orthotopic model after tumour-derived EV treatment.                                                                                                   |
| Theodoraki et al. [83]         | 2018 | Head and Neck Squamous cell carcinoma                                  | -                               | HNSCC ( <i>n</i> = 9), Controls ( <i>n</i> = 5)                      | TSG 101, CD63           | No | Yes                 | NanoSight LM-10 (Malvern) | EV cargo reflect EMT progression/regression of the parental tumour in response to PDT; and induced EMT progression/regression in recipient tumour cells following ex vivo co-incubation.                                                                                                                                     |
| Czystowska-Kuzmicz et al. [11] | 2019 | Ovarian carcinoma                                                      | -                               | OvCa ( <i>n</i> = 49), Controls ( <i>n</i> = 9)                      | Not in SEC samples      | No | Yes with Immunogold | qNano (Izon)              | ARG1 <sup>+</sup> small EVs are present in ascites, as well as in the plasma of OvCa patients. Cell line-derived ARG1 <sup>+</sup> EVs impair the functions of human and murine T-cells by blocking their proliferation and reducing                                                                                         |

|                      |      |                                                                                                   |                           |                         |                                                                                      |            |        |                           |                                                                                                                                                                 |
|----------------------|------|---------------------------------------------------------------------------------------------------|---------------------------|-------------------------|--------------------------------------------------------------------------------------|------------|--------|---------------------------|-----------------------------------------------------------------------------------------------------------------------------------------------------------------|
|                      |      |                                                                                                   |                           |                         |                                                                                      |            |        |                           | expression levels of the CD3ζ and CD3ε chains.                                                                                                                  |
| Sjoqvist et al. [86] | 2019 | Human Squamous cell carcinoma                                                                     | HaCaT, CC-2509, TR146     | -                       | CD9, Annexin 5, Flotillin                                                            | No         | Yes    | qNano (Izon)              | Keratinocyte and fibroblast-derived exosomes altered TR146 cancer cell proliferation as well as immortalized normal skin cells HaCaT.                           |
| Feasibility Studies  |      |                                                                                                   |                           |                         |                                                                                      |            |        |                           |                                                                                                                                                                 |
| Davies et al. [93]   | 2012 | Murine Melanoma                                                                                   | B16BL6                    | -                       | CD9                                                                                  | No         | Yes    | No                        | Microfluidic platform utilising in situ photopatterned porous polymer monoliths (PPM).                                                                          |
| Lobb et al. [41]     | 2015 | Human squamous Non-Small-Cell Lung Cancer                                                         | SK-MES-1                  | Healthy ( <i>n</i> = 1) | TSG101, CD63, Flotillin-1, HSP70, Calnexin                                           | Albumin    | Yes    | qNano (Izon)              | A comparison of SEC vs the kits Exo Quick and Exo Spin vs dUC. SEC was found to be optimal for clinical grade exosomes.                                         |
| Welton et al. [89]   | 2015 | Prostate cancer                                                                                   | Du145                     | Not described           | TSG101, CD9, CD81 and CD63 (ELISA) CD31, MHC Class I                                 | HSA, Apo-B | No     | NanoSight LM10 (Malvern)  | Comparison of Exo-Spin Midi Columns with UC. Also investigating concentration methods: CellGS Exosome precipitant with Exo-Spin kit or UC.                      |
| Suarez et al. [87]   | 2017 | Human Melanoma                                                                                    | SK-MEL103                 | -                       | MHC-I (W6/32), anti-CD59 (VJ1/12), anti-CD9 (VJ1/20), anti-CD63 (TEA3/10), anti-CD81 | No         | Yes    | NanoSight LM10 (Malvern)  | Use of aldehyde-sulphate latex beads to assist the characterisation of EVs by flow cytometry                                                                    |
| Flow cytometry       |      |                                                                                                   |                           |                         |                                                                                      |            |        |                           |                                                                                                                                                                 |
| Guerreiro et al. [1] | 2018 | Human oral squamous cell carcinoma, Pancreatic adenocarcinoma and Human Melanoma brain metastasis | PE/CA-PJ49/E10, BxPC3, H3 | -                       | CD9 (TSG 101, Alix, CD63, and CD81 no signal detected)                               | No         | Yes    | NanoSight NS500 (Malvern) | Use of a CELLline reactor culture flasks with SEC to isolate EVs.                                                                                               |
| Smith et al. [92]    | 2018 | Prostate Cancer                                                                                   | -                         | <i>n</i> = 1 or pooled  | TSG101 ELISA, Calnexin ELISA                                                         | No         | CryoEM | ZetaView (Malvern)        | Use of nanoscale deterministic lateral displacement (nanoDLD) arrays. Equal particle yield per input volume to qEV, better in terms of yield per time spent, or |

|                       |      |                                                      |                                       |                                                  |                                         |    |           |                           |                                                                                                                  |                                                                                       |
|-----------------------|------|------------------------------------------------------|---------------------------------------|--------------------------------------------------|-----------------------------------------|----|-----------|---------------------------|------------------------------------------------------------------------------------------------------------------|---------------------------------------------------------------------------------------|
|                       |      |                                                      |                                       |                                                  |                                         |    |           |                           |                                                                                                                  | input volume. Also more reproducible than UC, is quicker and captures RNA expression. |
| Altanerova et al. [2] | 2019 | Various tumour cells                                 | Primary Mesenchymal stem cells (MSCs) | -                                                | No                                      | No | No        | NanoSight (Malvern)       | Demonstration of MSC-exosomes with suicide genes represent a novel anticancer drug.                              |                                                                                       |
| Dong et al. [92]      | 2019 | Breast cancer                                        | Not described                         | Cancer ( <i>n</i> = 6), Controls ( <i>n</i> = 7) | Fluorescence method used for CD63, CD81 | No | Yes (SEM) | Zetaview (NTA)            | Use of an integrated ExoID-Chip for efficient isolation and detection of EVs from clinical serum samples.        |                                                                                       |
| Lane et al. [23]      | 2019 | Human breast cancer CCM EVs spiked into human plasma | MDA-MB-231                            | <i>n</i> = 1                                     | Mass Spec                               | No | No        | NanoSight NS300 (Malvern) | A Sepharose based SEC methodology.                                                                               |                                                                                       |
| Lennon et al. [3]     | 2019 | Pancreatic ductal adenocarcinoma                     | PANC-1                                | PDAC ( <i>n</i> = 5), Controls ( <i>n</i> = 6)   | CD63, TSG101                            | No | Yes       | Nanosight NS300 (Malvern) | Use of quantitative single molecule localization microscopy to detect EGFR and CA19-9 content on individual EVs. |                                                                                       |
| Ludwig et al. [4]     | 2019 | Head and Neck cancer, Metastatic melanoma            | UMSCC47, PCI-13, Mel526, SVEC4-10     | -                                                | TSG101, CD9, CD63, CD81 not seen in all | No | Yes       | qNano (Izon)              | An optimized method for the isolation of tumour-derived EVs from culture supernatants using mini-SEC method.     |                                                                                       |

Abbreviations: AML - Acute Myeloid Leukaemia, BPH – Benign Prostatic Hypertrophy, CRPC – Castration Resistant Prostate Cancer, CSPC – Castration Sensitive Prostate Cancer, EM – Electron Microscopy, FasL – Fas Ligand, HNSCC - Head and Neck Squamous cell carcinoma, MHC – Major Histocompatibility Complex, NTA – Nanoparticle Tracking Analysis, OSCC - Oral Squamous cell carcinoma, OPSCC - Oropharyngeal Squamous cell carcinoma, OvCa – Ovarian Cancer, PCI-13 – Cell line, PDAC – Pancreatic Ductal Adenocarcinoma, RPM – Revolutions Per Minute, SLE – Systemic Lupus Erythematosus. Words in bold are subheadings based on broad category of study.

## References:

1. Guerreiro, E.M.; Vestad, B.; Steffensen, L.A.; Steffensen, L.A.; D Aass, H.C.; Saeed, M.; Øvstebø, R.; Costea, D.E.; Galtung, H.K.; Søland, T.M. Efficient extracellular vesicle isolation by combining cell media modifications, ultrafiltration, and size-exclusion chromatography. *PLoS One* **2018**, *13*, e0204276, doi: 10.1371/journal.pone.0204276.

2. Altanerova, U.; Jakubechova, J.; Benejova, K.; Priscakova, P.; Pesta, M.; Pitule, P.; Topolcan, O.; Kausitz, J.; Zduriencikova, M.; Repiska, V., Altner, C. Prodrug suicide gene therapy for cancer targeted intracellular by mesenchymal stem cell exosomes. *Int. J. Cancer* **2019**, *144*, 897-908, doi: 10.1002/ijc.31792.
3. Lennon, K.M.; Wakefield, D.L.; Maddox, A.L.; Brehove, M.S.; Wilner, A.N. et al. Single molecule characterization of individual extracellular vesicles from pancreatic cancer. *J.Extracell. Vesicles* **2019**, *8*, doi: 10.1080/20013078.2019.1685634.
4. Ludwig, N.; Razzo, B.M.; Yerneni, S.S.; Whiteside, T.L. Optimization of cell culture conditions for exosome isolation using mini-size exclusion chromatography (mini-SEC). *Exp Cell Res* **2019**, *378*, 149-157, doi: 10.1016/j.yexcr.2019.03.014.

**Publisher's Note:** MDPI stays neutral with regard to jurisdictional claims in published maps and institutional affiliations.

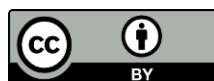

© 2020 by the authors. Licensee MDPI, Basel, Switzerland. This article is an open access article distributed under the terms and conditions of the Creative Commons Attribution (CC BY) license (<http://creativecommons.org/licenses/by/4.0/>).
